# Supplementary material for: Marked and rapid effects of pharmacological HIF-2α antagonism on hypoxic ventilatory control
Source: JCI journal article supplement (doi:10.1172/jci133194), 2020-01-30
Supplement: sd1 [file 1]

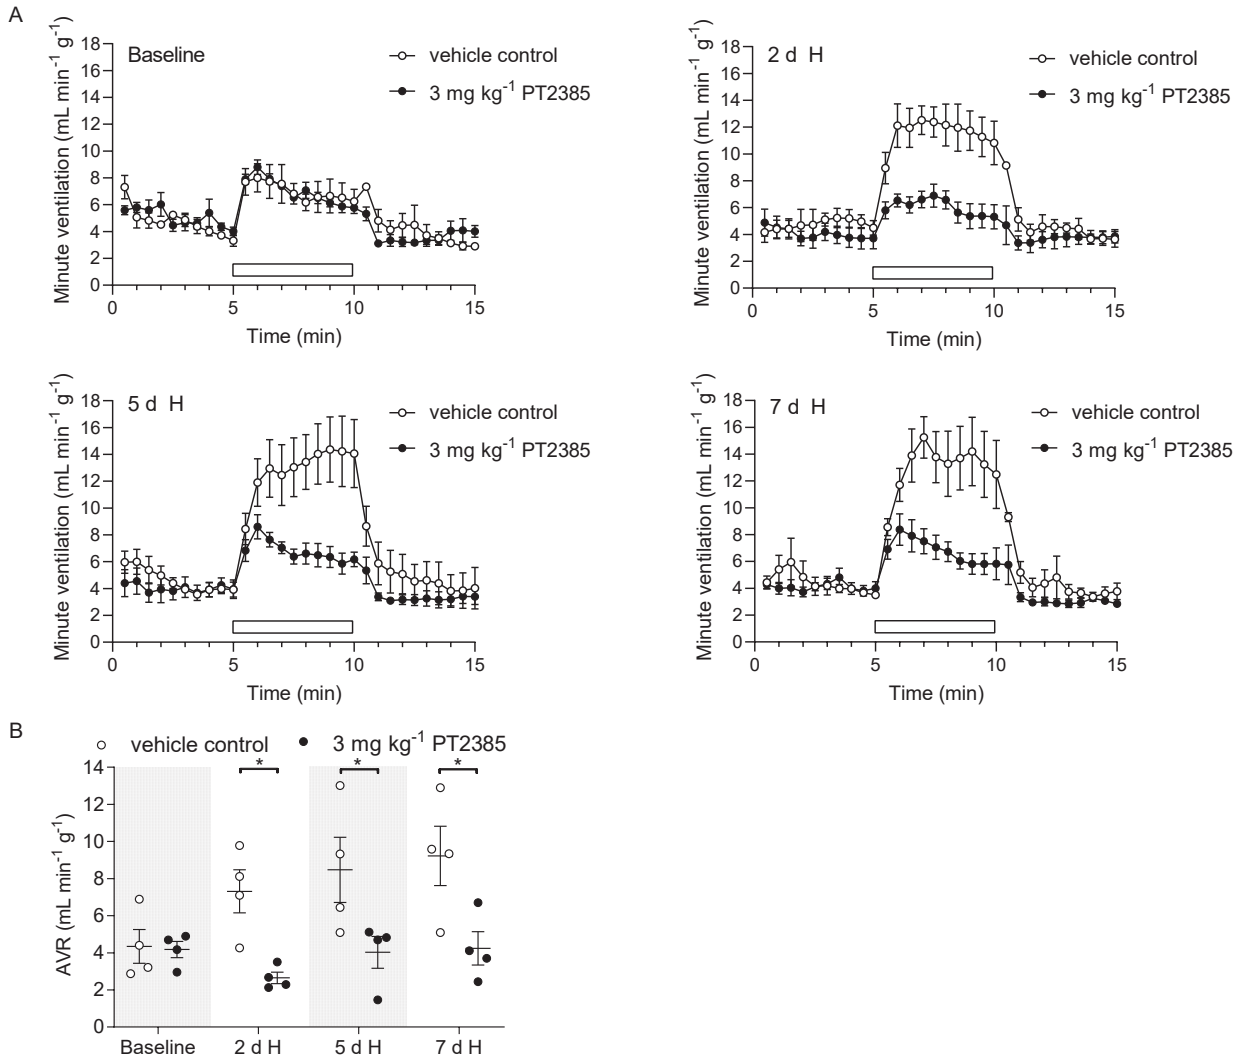

**Figure S1. Loss of ventilatory acclimatisation to hypoxia in male mice treated with  $3 \text{ mg kg}^{-1}$  PT2385.**

(A) Graphs show changes in minute ventilation in response to an acute (5 min) challenge with  $10\% \text{ O}_2/3\% \text{ CO}_2$  (open bars) in mice before (Baseline) and following twice daily treatment with  $3 \text{ mg kg}^{-1}$  PT2385 (or vehicle), beginning 24 h before 7 d exposure to hypoxia (H,  $10\% \text{ O}_2$ ) and continuing throughout (to a total of 8 days treatment) ( $n = 4$ ). (B) Graph shows acute ventilatory responses (AVRs) to challenges with  $10\% \text{ O}_2/3\% \text{ CO}_2$ , quantified from the minute ventilation data shown in (A). Data were analysed by a two-way repeated measures ANOVA with Baseline recordings removed from statistical analysis ( $P$  values shown in Table 1); followed by Holm-Sidak's multiple comparisons two-tailed test for which the significance is reported in the graph, \*  $P < 0.05$ .

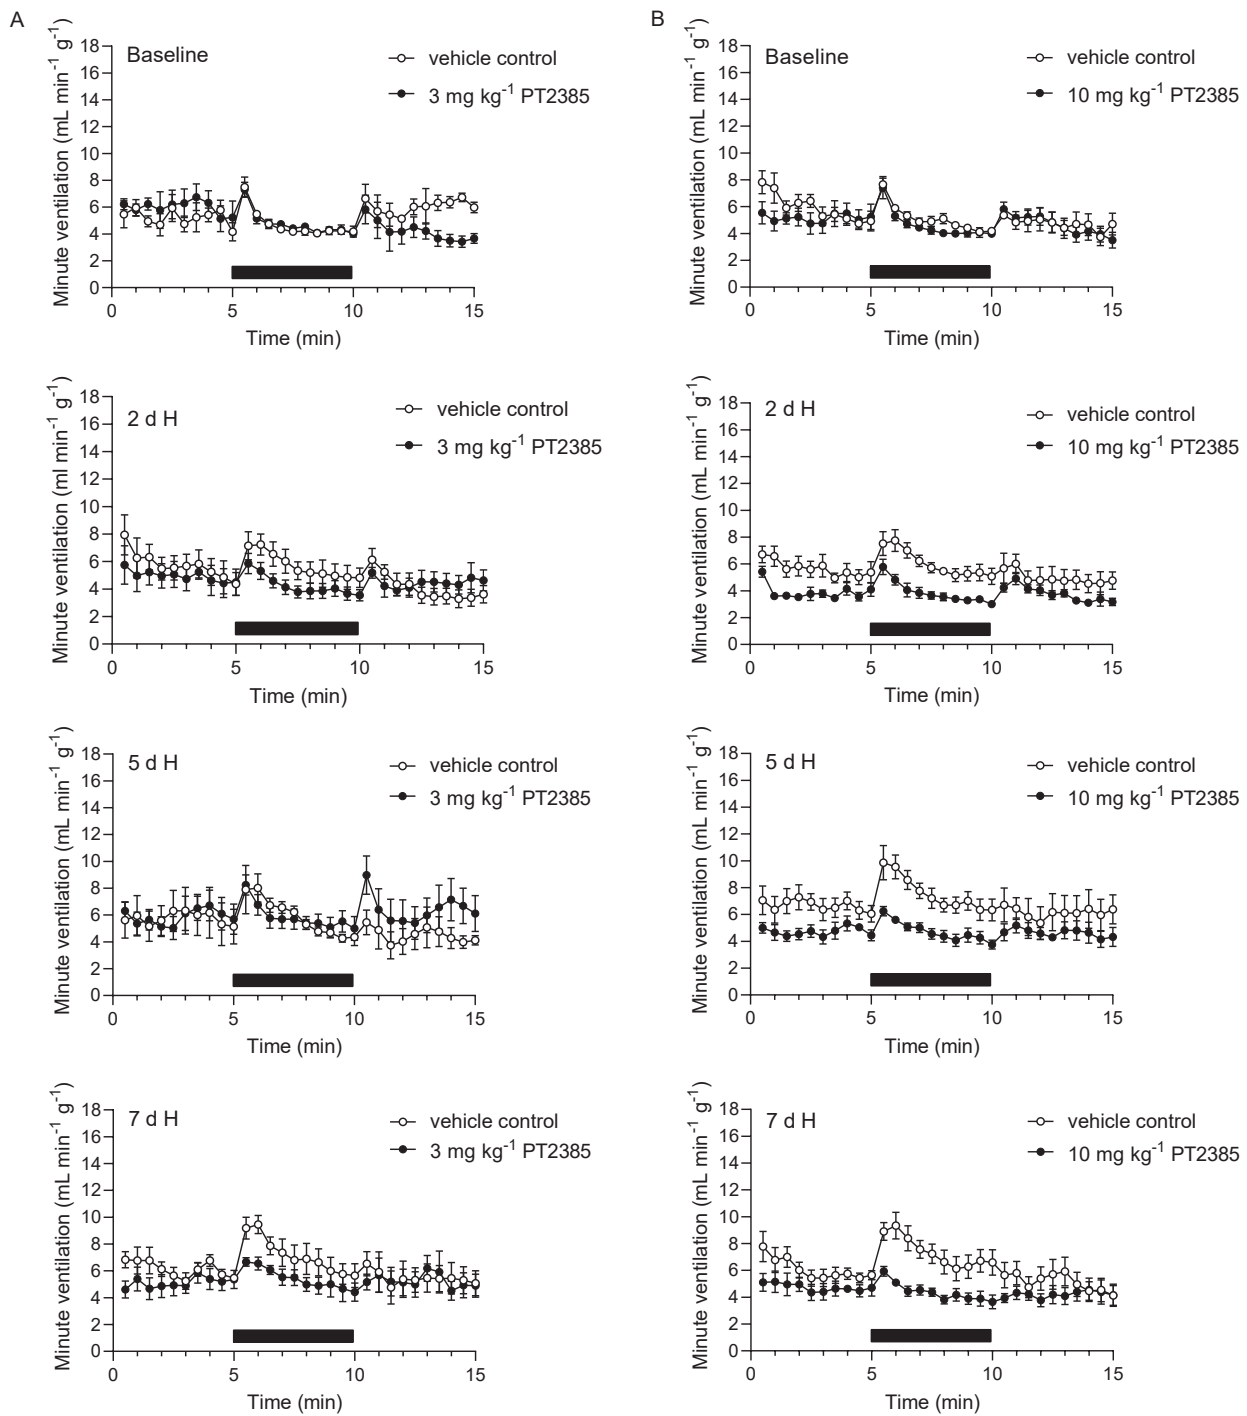

**Figure S2. Effects of PT2385 on enhanced ventilatory sensitivity to hypoxia in male mice as measured by acute challenge with 10 % oxygen.**

Graphs show changes in minute ventilation in response to an acute (5 min) challenge with 10 % O<sub>2</sub> (black bars) in mice before (Baseline) and following twice daily treatment with (A) 3 or (B) 10 mg kg<sup>-1</sup> PT2385 (or vehicle), beginning 24 h before 7 d exposure to hypoxia (H, 10 % oxygen) and continuing throughout (to a total of 8 days treatment)(*n* = 4, 3 mg kg<sup>-1</sup>; *n* = 6, 10 mg kg<sup>-1</sup>).

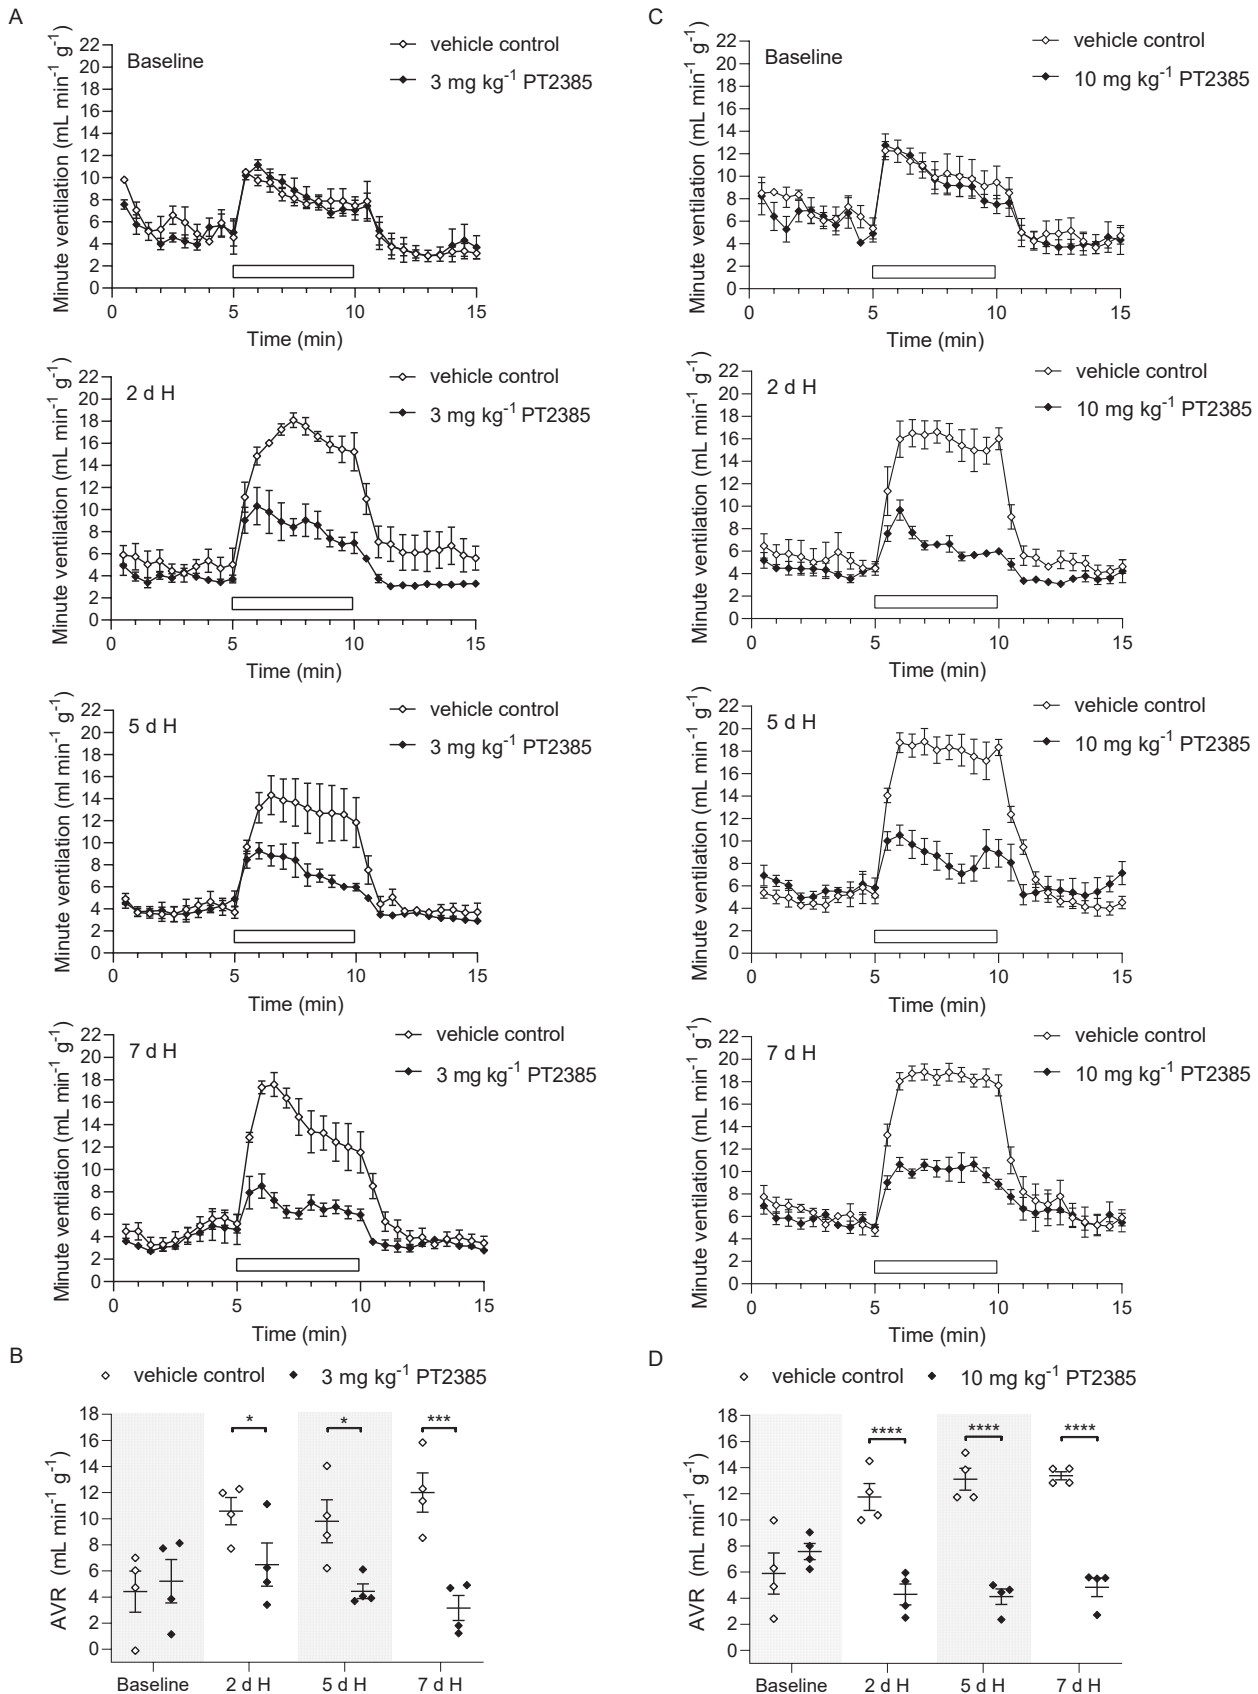

**Figure S3. Loss of ventilatory acclimatisation to hypoxia in female mice treated with PT2385.**

Graphs show changes in minute ventilation in response to an acute (5 min) challenge with 10 %  $\text{O}_2$ / 3 %  $\text{CO}_2$  (open bars) in mice before (Baseline) and following twice daily treatment with (A) 3 or (C) 10 mg  $\text{kg}^{-1}$  PT2385 (or vehicle), beginning 24 h before 7 d exposure to hypoxia (H, 10 % oxygen) and continuing throughout (to a total of 8 d treatment)( $n = 4$ ). (B, D) Graphs show acute ventilatory responses (AVRs) to challenges with 10 %  $\text{O}_2$ / 3 %  $\text{CO}_2$ , quantified from the minute ventilation data shown in (A, C). Data analysed by a two-way ANOVA matched by the time factor and with Baseline recordings removed from statistical analysis ( $P$  values shown in Table S1); followed by Holm-Sidak's multiple comparisons two-tailed tests for which the significance is reported in the graph, \*  $P < 0.05$ , \*\*\*  $P < 0.001$ , \*\*\*\*  $P < 0.0001$ .

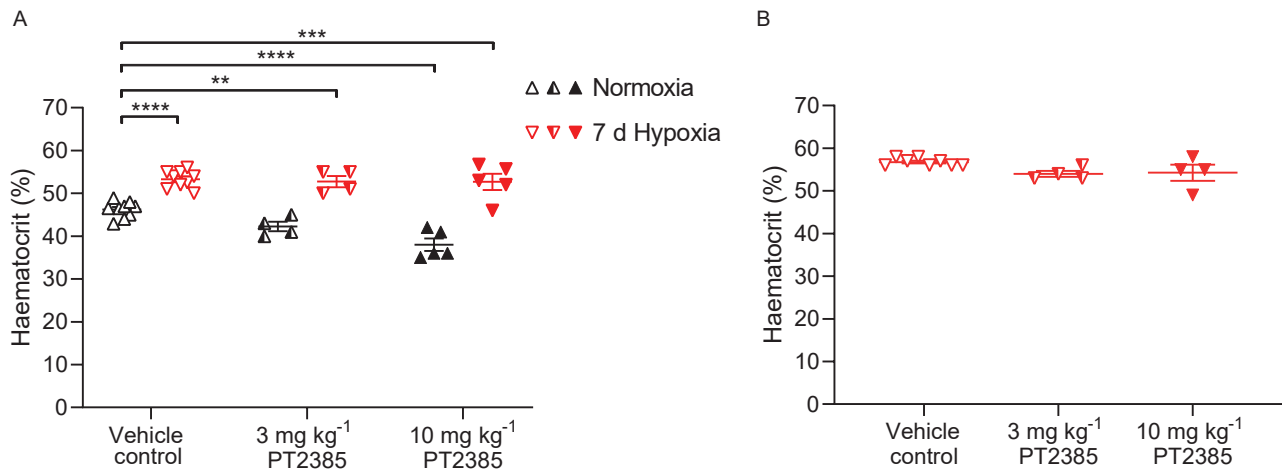

**Figure S4. Changes in haematocrit in wild-type mice treated with 3 or 10 mg kg<sup>-1</sup> PT2385 and maintained in normoxia or exposed to sustained hypoxia.**

Graphs show % haematocrit in the blood of wild-type (A) male and (B) female mice treated with 3 or 10 mg kg<sup>-1</sup> PT2385 beginning 24 h before, and continuing throughout, 7 d exposure to hypoxia (10 % oxygen), or normoxia (to a total of 8 d treatment). Data were analysed by a two-way (males) or one-way (females) ANOVA; followed by Holm-Sidak's multiple comparisons two-tailed tests, \*\*  $P < 0.01$ , \*\*\*  $P < 0.001$ , \*\*\*\*  $P < 0.0001$ .

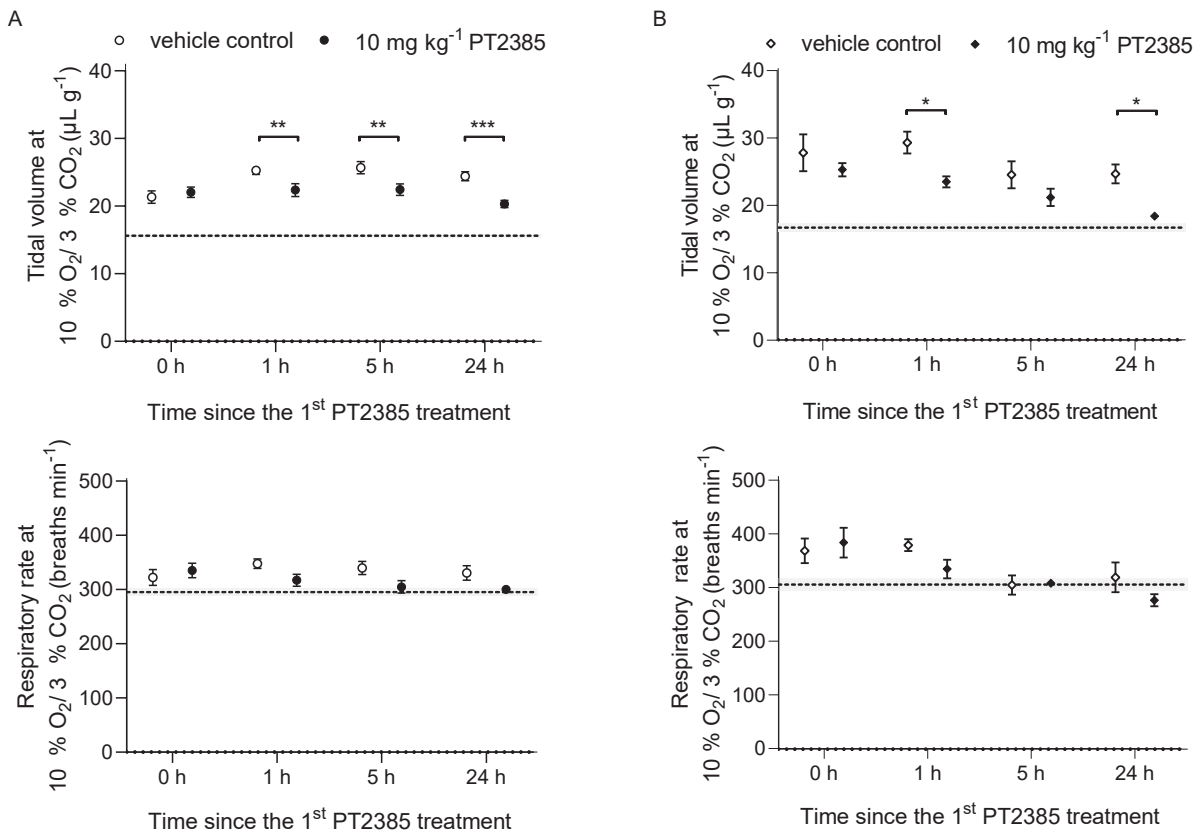

**Figure S5. Changes in tidal volume and respiratory rate in unacclimatised PT2385-treated mice.**

Graphs show average tidal volume (top panels) and respiratory rate (bottom panels) during 5 min challenges with 10 % O<sub>2</sub>/ 3 % CO<sub>2</sub>. Measurements were made before (0 h) and 1, 5 and 24 h after the first 10 mg kg<sup>-1</sup> PT2385 (or vehicle) dose in **(A)** male ( $n = 15$ ) and **(B)** female mice ( $n = 4$ ); second dose of PT2385 was given immediately after the 5 h measurements. Data were analysed by Holm-Sidak's multiple comparisons two-tailed tests, \*  $P < 0.05$ , \*\*  $P < 0.01$ , \*\*\*  $P < 0.001$ . Dotted line shows average resting tidal volume or respiratory rate in air across all time-points and treatment groups,  $\pm$  SEM (shaded area).

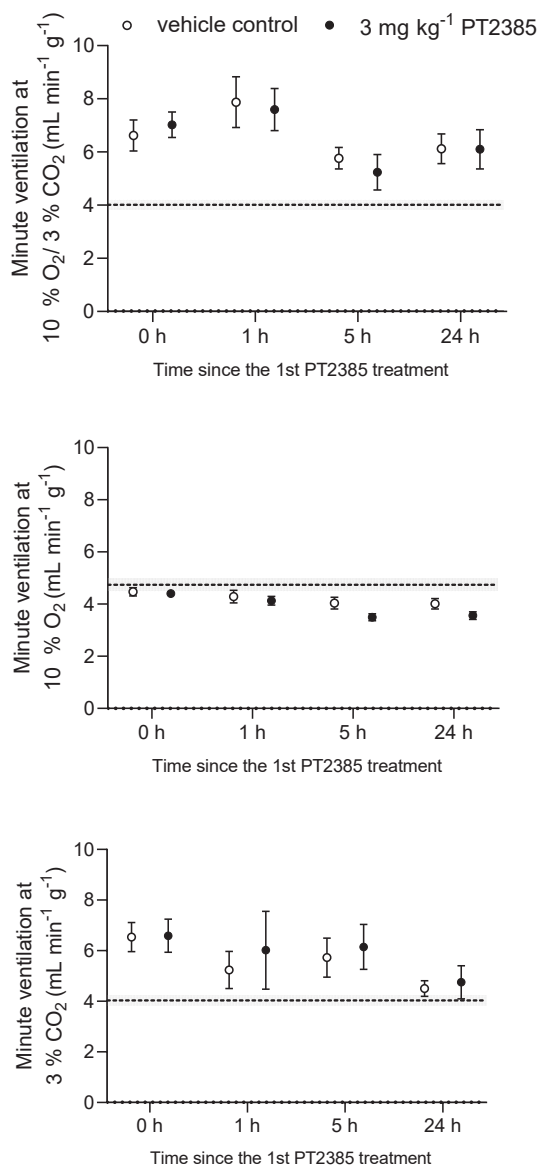

**Figure S6. Effects of 3 mg kg<sup>-1</sup> PT2385 on ventilatory sensitivity in unacclimatised male mice.**

Graphs show average minute ventilation during 5 min challenges with 10 % O<sub>2</sub>/3 % CO<sub>2</sub> (upper panel), 10 % O<sub>2</sub> (middle panel) or 3 % CO<sub>2</sub> (lower panel). Measurements were made before (0 h) and 1, 5 and 24 h after the first 3 mg kg<sup>-1</sup> PT2385 (or vehicle) dose (*n* = 8); second dose of PT2385 was given immediately after the 5 h measurements. Data were analysed by Holm-Sidak's multiple comparisons two-tailed tests with no significant effects detected. Dotted lines show the average resting minute ventilation in air prior to the acute gas challenge, across all time-points and treatment groups depicted in that graph, ± SEM (shaded area).

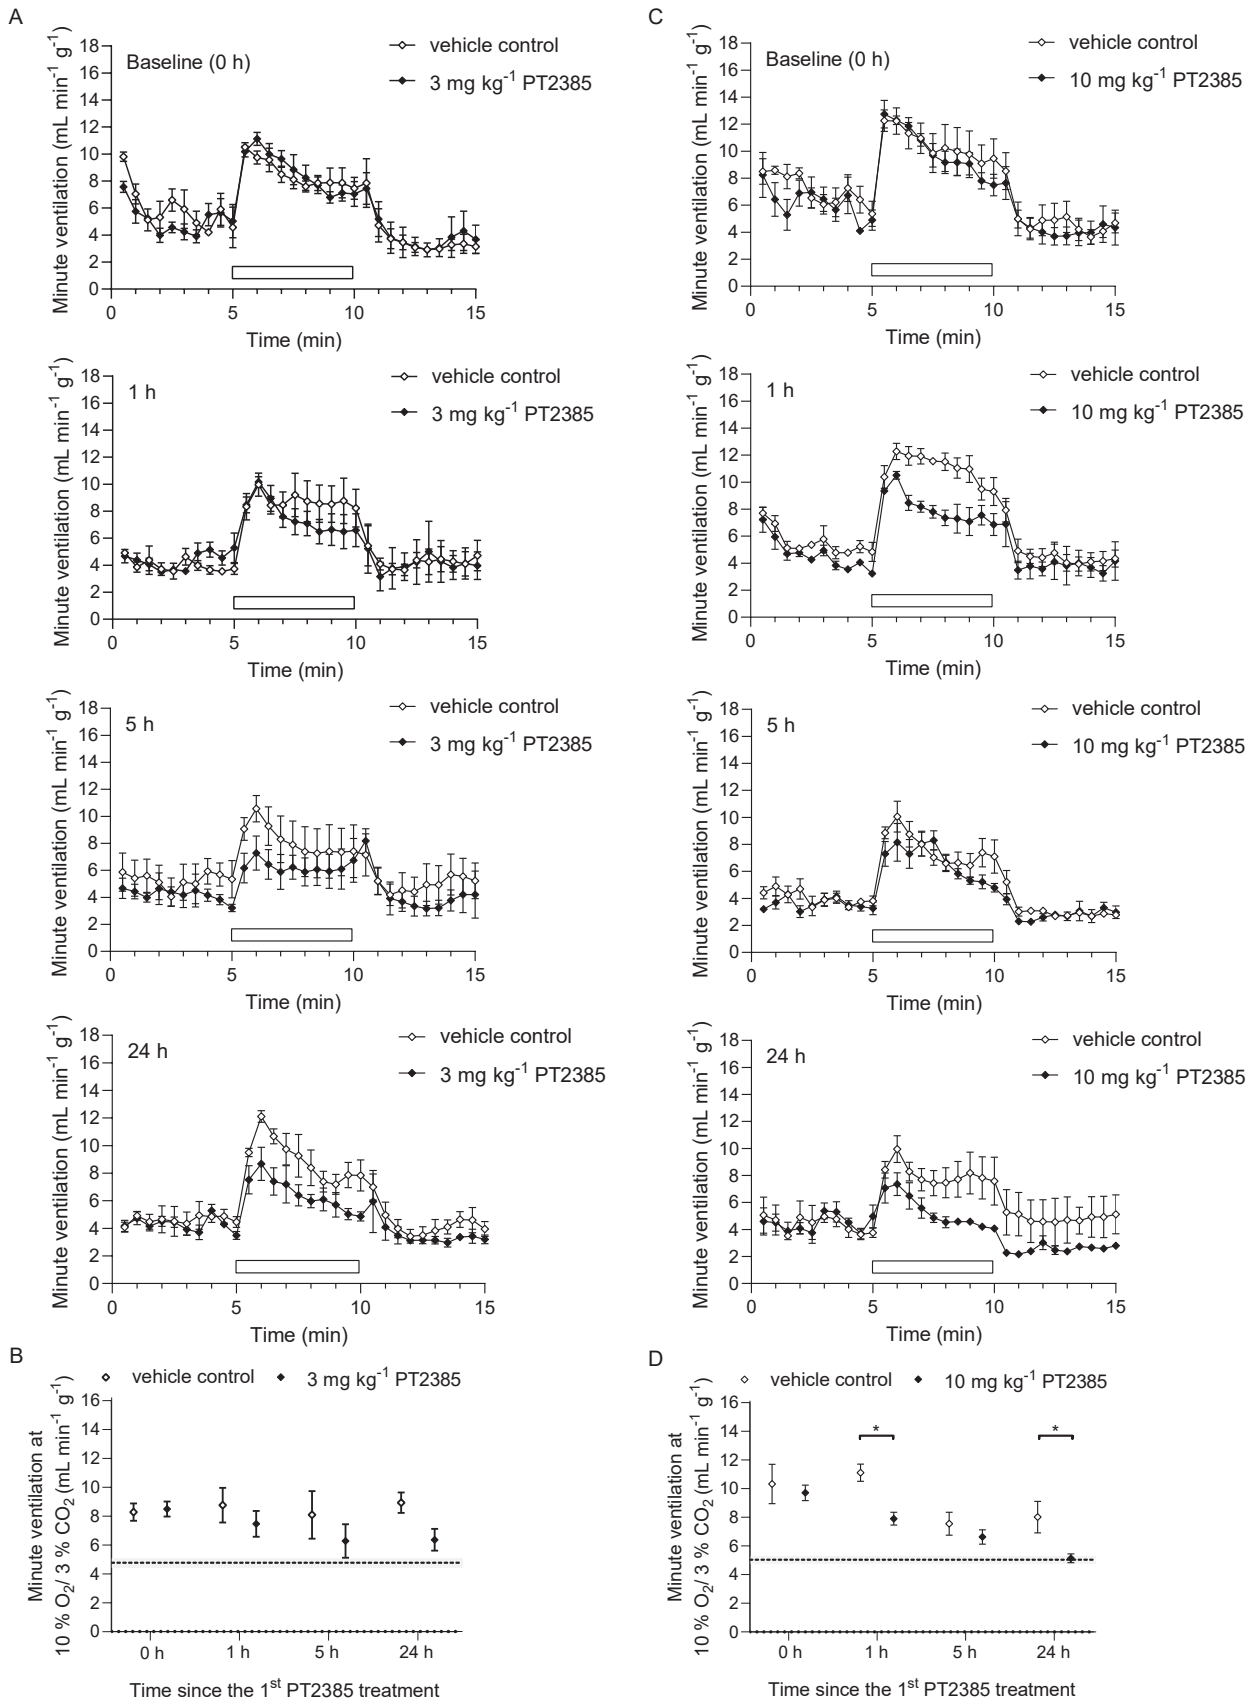

**Figure S7. Rapid effects of PT2385 on acute ventilatory responses to hypoxia in wild-type female mice.**

Graphs show changes in minute ventilation in response to an acute (5 min) challenge with  $10\% \text{ O}_2 / 3\% \text{ CO}_2$  (open bars). Measurements were made before (Baseline, 0 h) and 1, 5 and 24 h after the first (A) 3 or (C)  $10 \text{ mg kg}^{-1}$  PT2385 (or vehicle) dose ( $n = 4$ ); second dose of PT2385 was given immediately after the 5 h measurements. (B, D) Graphs show average minute ventilation during 5 min challenges with  $10\% \text{ O}_2 / 3\% \text{ CO}_2$  (calculated from data in A, C). Data were analysed by Holm-Sidak's multiple comparisons two-tailed tests, \*  $P < 0.05$ . Dotted lines show the average resting minute ventilation in air prior to the acute gas challenge, across all time-points and treatment groups depicted in that graph,  $\pm$  SEM (shaded area).

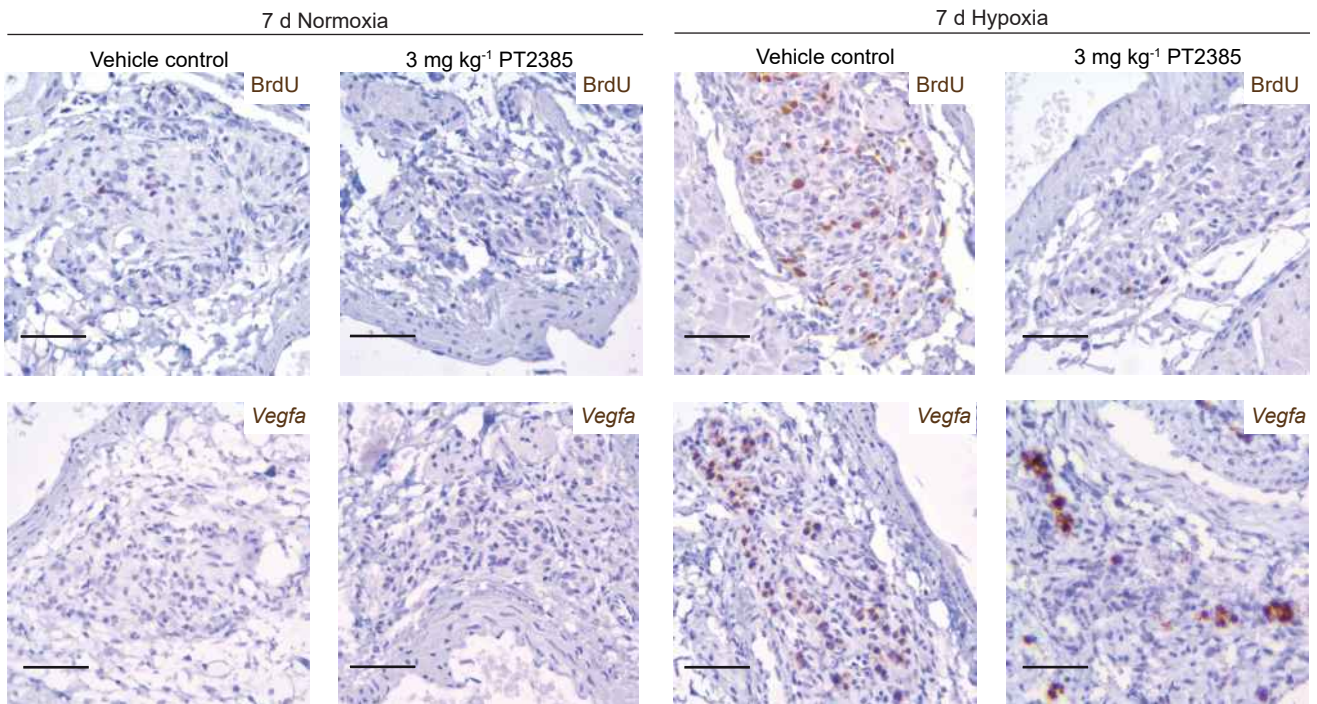

**Figure S8. Responses to hypoxia in carotid bodies of male mice treated with 3 mg kg<sup>-1</sup> PT2385.**

Representative images of immunostaining for BrdU and in situ hybridisation for *Vegfa* mRNA in carotid bodies of mice treated twice daily with 3 mg kg<sup>-1</sup> PT2385 (or vehicle) beginning 24 h before, and continuing throughout, 7 d exposure to hypoxia (10 % oxygen) or normoxia (to a total of 8 d treatment). Number of BrdU+ cells/ CB area and *Vegfa* mRNA+ CB area quantified in Figure 4A. Scale bars represent 50 μm.



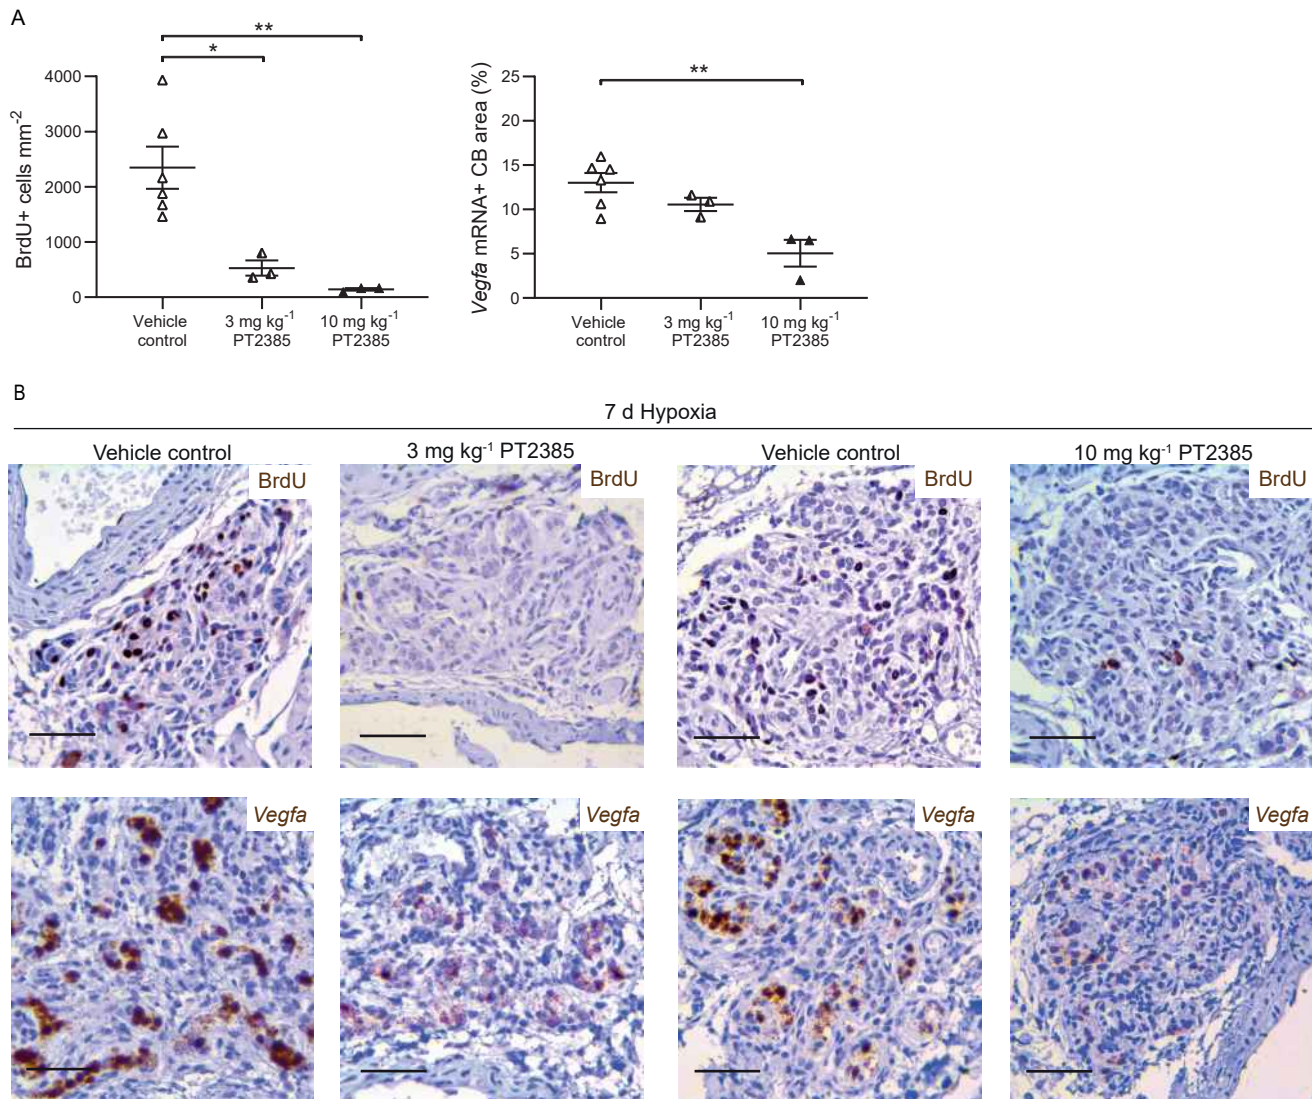

**Figure S9. Effects of PT2385 on cellular responses to hypoxia in the carotid bodies of female mice.**

(A) Morphometry and (B) representative images of carotid bodies (CBs) from wild-type female mice exposed to 7 d hypoxia (10 % oxygen) and treated twice daily with 3 or 10 mg kg<sup>-1</sup> PT2385 (or vehicle) for 8 d. (A) Quantification of BrdU+ cells per mm<sup>2</sup> (left panel) and *Vegfa* mRNA+ CB area of the CB (right panel). Data were analysed by one-way ANOVAs followed by Holm-Sidak's multiple comparisons two-tailed tests, for which significance is reported in the graphs, \*  $P < 0.05$ , \*\*  $P < 0.01$ . (B) Immunostaining for BrdU and *Vegfa* mRNA in situ hybridisation. Scale bars represent 50 µm.

**Table S1. Effect of PT2385 on ventilatory acclimatisation to hypoxia in wild-type female**

**mice.**

|                                         |                         | AVR (mL min <sup>-1</sup> kg <sup>-1</sup> ) |     |                              |                               |                         |                 |                  |                               |              |                         |
|-----------------------------------------|-------------------------|----------------------------------------------|-----|------------------------------|-------------------------------|-------------------------|-----------------|------------------|-------------------------------|--------------|-------------------------|
|                                         |                         | 3 mg kg <sup>-1</sup> PT2385                 |     |                              | 10 mg kg <sup>-1</sup> PT2385 |                         |                 |                  |                               |              |                         |
|                                         |                         | Vehicle control                              |     | 3 mg kg <sup>-1</sup> PT2385 |                               | ANOVA<br><i>P</i> value | Vehicle control |                  | 10 mg kg <sup>-1</sup> PT2385 |              | ANOVA<br><i>P</i> value |
| Time-point                              |                         | Mean                                         | SEM | Mean                         | SEM                           |                         | Mean            | SEM              | Mean                          | SEM          |                         |
| 10% O <sub>2</sub>                      | Baseline                | -0.35 ± 0.31                                 |     | 0.34 ± 0.99                  |                               | -0.52 ± 1.00            |                 | -0.25 ± 0.77     |                               |              |                         |
|                                         | 2 d H                   | 1.85 ± 0.60                                  |     | 0.72 ± 0.38                  |                               | 1.34 ± 0.53             |                 | -0.10 ± 0.66     |                               |              |                         |
|                                         | 5 d H                   | 2.74 ± 0.91                                  |     | 0.19 ± 0.65                  | 0.976                         | 3.33 ± 1.35             |                 | -1.90 ± 0.34     |                               | 0.370        |                         |
|                                         | 7 d H                   | 3.51 ± 1.41                                  |     | -1.01 ± 1.21                 |                               | 3.88 ± 0.74             |                 | -0.74 ± 0.39     |                               |              |                         |
|                                         | ANOVA<br><i>P</i> value |                                              |     | <b>0.002</b>                 |                               | 0.301                   |                 | <b>0.001</b>     |                               | <b>0.043</b> |                         |
| 10% O <sub>2</sub> / 3% CO <sub>2</sub> | Baseline                | 4.42 ± 1.58                                  |     | 5.22 ± 1.66                  |                               | 5.89 ± 1.58             |                 | 7.57 ± 0.61      |                               |              |                         |
|                                         | 2 d H                   | 10.58 ± 1.04                                 |     | 6.49 ± 1.65                  |                               | 11.75 ± 1.03            |                 | 4.29 ± 0.80      |                               |              |                         |
|                                         | 5 d H                   | 9.81 ± 1.64                                  |     | 4.44 ± 0.56                  | 0.564                         | 13.12 ± 0.84            |                 | 4.12 ± 0.59      |                               | 0.342        |                         |
|                                         | 7 d H                   | 12.01 ± 1.51                                 |     | 3.16 ± 0.96                  |                               | 13.38 ± 0.31            |                 | 4.84 ± 0.71      |                               |              |                         |
|                                         | ANOVA<br><i>P</i> value |                                              |     | <b>0.001</b>                 |                               | 0.212                   |                 | <b>&lt;0.001</b> |                               | 0.553        |                         |
| 3% CO <sub>2</sub>                      | Baseline                | 6.97 ± 1.04                                  |     | 6.83 ± 1.66                  |                               | 5.29 ± 0.62             |                 | 5.79 ± 0.88      |                               |              |                         |
|                                         | 2 d H                   | 2.92 ± 0.30                                  |     | 2.41 ± 0.24                  |                               | 4.63 ± 0.79             |                 | 2.94 ± 0.87      |                               |              |                         |
|                                         | 5 d H                   | 5.01 ± 0.80                                  |     | 2.47 ± 0.68                  | 0.125                         | 6.63 ± 0.89             |                 | 3.95 ± 0.24      |                               | 0.287        |                         |
|                                         | 7 d H                   | 4.80 ± 0.87                                  |     | 2.65 ± 0.56                  |                               | 4.98 ± 0.71             |                 | 3.71 ± 1.40      |                               |              |                         |
|                                         | ANOVA<br><i>P</i> value |                                              |     | <b>0.030</b>                 |                               | 0.193                   |                 | <b>0.032</b>     |                               | 0.736        |                         |

Acute ventilatory responses (AVRs) of wild-type female mice before (Baseline) and following twice daily treatment with 3 mg kg<sup>-1</sup> or 10 mg kg<sup>-1</sup> PT2385 (or vehicle), beginning 24 h before 7 d hypoxia (H, 10 % oxygen) and continuing throughout (to a total of 8 d treatment). Two-way repeated measures ANOVAs (right hand column *P* value = time factor; bottom row *P* value = drug factor; right column, bottom row *P* value = time/ drug interaction factor), matched by the time factor, with the Baseline (prior to PT2385) recordings excluded from statistical analysis; *n* = 4. *P* < 0.05 comparisons are highlighted in bold.
